# Supplementary material
Source: Elsevier journal article supplement (https://www.sciencedirect.com/science/article/pii/S2341287919301152)
Supplement: mmc1 [file S2341287919301152:mmc1.docx]

**ANPEDIA-19-114**

**E-APPENDED**

**PROTOCOLO DE ESTUDIO Y TRATAMIENTO DE LA P.T.I. PTI-2018◊**

**Título abreviado:** PROTOCOLO DE ESTUDIO Y TRATAMIENTO DE LA P.T.I. PTI-2018

Emilio Monteagudoa*, Itziar Astigarragab, Áurea Cerverac, Mª Angeles Dasíd, Ana Sastree, Rubén Berruecof, José Luis Dapenag, en representación del Grupo de Trabajo de la PTI de la SEHOP

aServicio de Pediatría y sus Áreas Específicas. Hospital Infantil La Fe, Valencia,

bHospital de Cruces. Bilbao.

cHospital de Móstoles, Madrid

dHospital Infantil La Fe, Valencia

eHospital Infantil La Paz, Madrid

fHospital Sant Joan de Déu, Barcelona

gHospital Infantil Valle de Hebrón, Barcelona

**◊**Presentado y aprobado en el XI Congreso Nacional de la Sociedad Española de Hematología y Oncología Pediátricas, Alicante 31 de Mayo-2 de Junio de 2018.

*Correo electrónico: [emonteagudo@aehh.org](mailto:emonteagudo@aehh.org)

**RESUMEN**

La trombocitopenia inmune primaria, anteriormente conocida como púrpura trombocitopénica inmune, es una enfermedad cuyo manejo diagnóstico y terapéutico ha sido siempre controvertido. La Sociedad Española de Hematología y Oncología Pediátricas, a través del grupo de trabajo de la PTI, ha actualizado el documento con las recomendaciones protocolizadas para el diagnóstico y tratamiento de esta enfermedad, basándose en las guías clínicas disponibles actualmente, revisiones bibliográficas, ensayos clínicos y el consenso de sus miembros. El objetivo principal es disminuir la variabilidad clínica en los procedimientos diagnósticos y terapéuticos con el fin de obtener los mejores resultados clínicos, los mínimos efectos adversos y preservar la calidad de vida.

**Palabras clave:** PTI, púrpura trombocitopénica inmune, trombocitopenia inmune primaria, infancia
