# Supplementary material
Source: Elsevier journal article supplement (https://www.sciencedirect.com/science/article/pii/S2341287919301152)
Supplement: mmc2 [file S2341287919301152:mmc2.docx]

Tabla 1. Criterios de evaluación clínica (10)

| Asintomático  Clínica Cutánea  Clínica Cutáneo-Mucosa  Sangrado Activo:   - Epistaxis que precisa taponamiento - Hematuria macroscópica - Hemorragia digestiva macroscópica - Menorragia - Gingivorragia importante - Cualquier hemorragia con riesgo razonable de precisar trasfusión de hematíes o que condicione un daño orgánico grave |
| --- |

Tabla 2. Factores de riesgo hemorrágico.

| TCE, politraumatismo previo  Cirugía previa (10 días previos)  Antiagregantes hasta 7-10 días antes, anticoagulantes  Diátesis hemorrágica: coagulopatía, vasculitis |
| --- |

Tabla 3. Criterios de respuesta al tratamiento (10)

| REMISIÓN COMPLETA (RC). Recuento igual o superior a 100.000/μL mantenido más de seis semanas tras la supresión del tratamiento  REMISIÓN PARCIAL (RP).Elevación sobre la cifra inicial con recuento entre 30.000 y 100.000/ μL mantenido más de 6 semanas tras la supresión del tratamiento  AUSENCIA DE RESPUESTA (AR). No se modifica clínica ni biológicamente  RESPUESTA TRANSITORIA (RT). Mejoría inicial (clínica o biológica) con nueva clínica ó recuento inferior a 30.000/μL antes de seis semanas de haber finalizado el tratamiento  RECAÍDA (REC). Recuento inferior a 30.000/ μL después de seis semanas de haber finalizado el tratamiento, habiéndose obtenido previamente una remisión completa (RC) o parcial (RP) |
| --- |

Tabla 4. Estudios recomendados al diagnóstico.

| Hemograma y recuento de reticulocitos, se observa trombocitopenia aislada  Morfología en sangre periférica con revisión por persona experta, normal  Estudio de Hemostasia: TP, TTPA, fibrinógeno  Grupo, Rh y Coombs directo  Inmunoglobulinas  Estudio microbiológico de: CMV, EBV, parvovirus B19, herpes simple, herpes 6, VIH, hepatitis B y C  Bioquímica hemática: GOT, GPT, LDH, glucosa, urea, creatinina.  Sedimento urinario  Estudio morfológico de médula ósea por punción aspirativa. Indicado en todos los niños que presenten alguna de las siguientes condiciones: clínica que no sea la típica, si hay otras citopenias en el hemograma, aquellos que no responden al tratamiento de primera línea y en los pacientes no tratados que no remiten espontáneamente. |
| --- |

Tabla 5. Recomendaciones generales.

| - Al diagnóstico, considerar el ingreso hospitalario en pacientes con sangrado activo, factores de riesgo hemorrágico o con recuento de plaquetas igual o inferior a 20.000/μL. - Evitar inyectables intramusculares y punciones vasculares en vasos de difícil compresión. - Contraindicado el empleo de ácido acetil salicílico o sus derivados; administrar sólo en caso de ser estrictamente necesario otros fármacos que puedan alterar la agregación plaquetar (antihistamínicos, antiinflamatorios no esteroideos). - Deportes: restricción en función de la clínica y riesgo traumático - Antifibrinolíticos: ácido tranexámico(14). Especialmente en pacientes con hemorragia activa y en hemorragia de mucosas. Contraindicado si hay hematuria. Se puede administrar por vía oral a dosis de 20 mg/kg/8-12h o bien por vía IV 10 mg/kg/8-12h. |
| --- |

Tabla 6. Recomendaciones para el manejo de las urgencias con riesgo vital, situaciones de riesgo especial y esplenectomía programada.

| Urgencias con riesgo vital **Hemorragias del SNC**  **Otras hemorragias que comprometan la vida del paciente**  Se administran sucesivamente:  1º metilprednisolona i.v. 10 mg/kg  2º gammaglobulina i.v. 400 mg/kg  3º plaquetas 1 unidad / 5-10 kg/6-8 h  4º gammaglobulina i.v. 400 mg/kg  5º esplenectomía urgente: valorar según cada caso Situaciones con riesgo especial **TCE, politraumatizados y cirugía urgente**  Administrar IGIV 0,8-1 g/kg si plaquetas < 50.000/μL y plaquetas si recuento < 10.000/μL  **Cirugía programada (valorar riesgo hemorrágico según intervención)**  IGIV 0,8-1 g/kg si plaquetas < 50.000/μL  **Esplenectomía programada**  IGIV 0,8-1 g/kg si plaquetas < 20.000/μL  Clampaje precoz de la arteria esplénica |
| --- |
